# Supplementary material for: Fullerene as a probe molecule for single-atom oxygen reduction electrocatalysts
Source: Royal Society of Chemistry journal article supplement (doi:10.1039/d4cc03901g), 2024-01-01
Supplement: d4cc03901g1.pdf [file d4cc03901g1.pdf]

## Fullerene as a Probe Molecule for Single-Atom Oxygen Reduction Electrocatalysts

Ning Li<sup>#a</sup>, Kun Guo<sup>\*\*a</sup>, Song Lu<sup>b</sup>, Lipiao Bao<sup>a</sup>, Zhixin Yu<sup>c</sup>, and Xing Lu<sup>\*a</sup>

*<sup>a</sup>State Key Laboratory of Materials Processing and Die & Mould Technology, School of Materials Science and Engineering, Huazhong University of Science and Technology, Wuhan 430074, China*

*<sup>b</sup>Institute of New Energy, School of Chemistry and Chemical Engineering, Shaoxing University, Shaoxing 312000, China*

*<sup>c</sup>Department of Energy and Petroleum Engineering, University of Stavanger, Stavanger 4036, Norway*

<sup>#</sup>These authors contributed equally to this work.

\*Corresponding author:

K. Guo ([guok@hust.edu.cn](mailto:guok@hust.edu.cn))

X. Lu ([lux@hust.edu.cn](mailto:lux@hust.edu.cn))

## Table of Contents

|                                                                                                                                                                                                                                                                                                                                                       |    |
|-------------------------------------------------------------------------------------------------------------------------------------------------------------------------------------------------------------------------------------------------------------------------------------------------------------------------------------------------------|----|
| <b>Experimental Section</b> .....                                                                                                                                                                                                                                                                                                                     | 3  |
| <b>Figure S1.</b> Polarization plots of ORR on various MP/CNT (M = Fe, Mn, Ni, Co) with a MP loading of 50 wt.% and their corresponding $E_{1/2}$ values in 0.1 M KOH at 1600 rpm. ....                                                                                                                                                               | 6  |
| <b>Figure S2.</b> Polarization plots of ORR on various CoP/CNT with CoP:CNT mass ratios of 1:4, 1:2, 1:1, 4:1 and their corresponding $E_{1/2}$ values in 0.1 M KOH at 1600 rpm.....                                                                                                                                                                  | 7  |
| <b>Figure S3.</b> SEM and TEM images of CNT (a,b), CoP/CNT (c,d), and C <sub>60</sub> -CoP/CNT (e,f).....                                                                                                                                                                                                                                             | 8  |
| <b>Figure S4.</b> Full-survey XPS spectra of CoP, CoP/CNT, and C <sub>60</sub> -CoP/CNT.....                                                                                                                                                                                                                                                          | 9  |
| <b>Figure S5.</b> HO <sub>2</sub> <sup>-</sup> yield and electron transfer number ( $n$ ) value derived from the rotating ring-disk electrode test of CoP/CNT. ....                                                                                                                                                                                   | 10 |
| <b>Figure S6.</b> Geometric configurations of C <sub>60</sub> adsorbed to carbon-supported CoP without (a) and with (b) an O <sub>2</sub> molecule bound to the Co site. The spatial distances between Co atom and a C atom in the bottom pentagon of C <sub>60</sub> are indicated. Color code: C, cyan; N, blue; H, white; Co, green; O, black..... | 11 |
| <b>References</b> .....                                                                                                                                                                                                                                                                                                                               | 12 |

## Experimental Section

### 1. Chemicals

All chemicals were purchased and used as received without further treatment unless otherwise indicated. C<sub>60</sub> fullerene (99%) was purchased from Xiamen Funano New Material Technology Co., Ltd. Cobalt(II) meso-tetraphenylporphine (CoP, 98%), nickel(II) meso-tetraphenylporphine (NiP, 97%), iron(III) meso-tetraphenylporphine chloride (FeP, 95%), and (5,10,15,20-tetraphenylporphinato) manganese(III) chloride (MnP, 95%) were bought from Shanghai Aladdin Biochemical Technology Co., LTD. Potassium hydroxide (KOH, ≥85.0%), potassium thiocyanate (KSCN, ≥98.5%), and carbon disulfide (CS<sub>2</sub>, 99.9%) were ordered from Sinopharm Chemical Reagent Co., Ltd. Carbon nanotube (CNT, multi-walled, 95%, length of 10–30 μm and diameter of 10–20 nm) was received from Nanjing XFNANO Materials Tech Co., Ltd. Ketjenblack EC-600 JD (KB) was ordered from AkzoNobel. Nafion ionomer solution (5 wt%) was obtained from Sigma Aldrich. Deionized water (18.2 MΩ·cm) was used in all the experiments.

### 2. Materials Synthesis

#### Synthesis of CNT-supported metalloporphyrins (MP/CNT)

Taking the synthesis of CoP/CNT as an example, 20 mg of CoP was dissolved in 10 mL of CS<sub>2</sub> to form a homogeneous solution, into which 20 mg of CNT was thoroughly dispersed by ultrasonication for 2 h. The final product was then received by vacuum rotary evaporation at 80 °C and a rotating speed of 400 rpm to remove CS<sub>2</sub>. NiP/CNT, FeP/CNT, and MnP/CNT were prepared by simply replacing CoP with the same mass of NiP, FeP, and MnP, respectively.

#### Synthesis of C<sub>60</sub>-adsorbed MP/CNT

C<sub>60</sub>-CoP/CNT was synthesized by dissolving 20 mg of CoP and 22 mg of C<sub>60</sub> in 10 mL of CS<sub>2</sub> to form a homogeneous solution, into which 20 mg of CNT was thoroughly dispersed by ultrasonication for 2 h. The final product was then received by vacuum rotary evaporation at 80 °C and a rotating speed of 400 rpm to remove CS<sub>2</sub>. C<sub>60</sub>-NiP/CNT was prepared by simply replacing CoP with the same mass of NiP.

### 3. Material Characterization

Transmission electron microscopy (TEM) was carried out on a JEM-2010F (JEOL) electron microscope at an accelerating voltage of 200 kV. A copper grid coated with a thin carbon film was used

as the specimen holder. Scanning electron microscopy (SEM) was performed on a Nova NanoSEM 450 (FEI) electron microscope at an accelerating voltage of 10 kV.

X-ray powder diffraction (XRD) was performed to obtain the crystallographic information of the samples. The powder diffraction patterns were recorded on a Malvern Panalytical X-ray diffractometer (Empyrean) using Cu K $\alpha$  radiation source ( $\lambda = 1.5406 \text{ \AA}$ , 45 kV and 40 mA). Scanning angles for all samples were set in the  $2\theta$  range of  $5\text{--}90^\circ$  with a step size of  $0.01313^\circ$  and time per step of 120 s. Peaks were indexed to the database established by Joint Committee on Powder Diffraction Standards (JCPDS).

Raman spectrum was acquired using a confocal Raman microscope (LabRAM HR800, Horiba JobinYvon) equipped with an optical microscope, a CCD camera, and an argon ion laser source. The laser provided 0.2 mW power at a wavelength of 532 nm for the exciting line. Integration time was 60 s, number of co-addition was 2, and slit aperture size was  $50 \times 1000 \text{ }\mu\text{m}$ .

X-ray photoelectron spectroscopy (XPS) analysis was performed on the K-Alpha X-ray photoelectron spectrometer system (Thermo Fisher Scientific) utilizing a monochromatic Al K $\alpha$  source (1486.69 eV). High-resolution spectra were obtained at a pass energy of 50.0 eV, a step size of 0.1 eV, and a dwell time of 250 ms per step. The analysis spot size was  $400 \text{ }\mu\text{m}$ . All binding energies were calibrated to the graphitic C 1s peak at 284.8 eV. XPS peaks were deconvolved and curve-fitted on the CasaXPS software using the Lorentzian function and Shirley background.

#### 4. Electrochemical Measurements

Electrochemical measurements were conducted on a CHI760E electrochemical workstation (Shanghai Chenhua Instruments Co., Ltd., China) and a MSR rotator (Pine Instrument Company, USA) in a standard three-electrode cell at room temperature ( $25^\circ\text{C}$ ). A glassy carbon rotating disk electrode (RDE, diameter of 5 mm), an Ag/AgCl in saturated KCl electrode, and a platinum foil were used as the working, reference, and counter electrodes, respectively. All potentials were calibrated to the reversible hydrogen electrode (RHE) according to the Nernst equation  $E_{\text{vs RHE}} = E_{\text{vs Ag/AgCl}} + 0.198 + 0.0592 \times \text{pH}$ . 0.1 M KOH aqueous solution with a pH value of 13 was used as the electrolyte.

The working electrode was fabricated via the following procedures: 5 mg of the as-prepared catalyst was dispersed in a mixture of 960  $\mu\text{L}$  of ethanol and 40  $\mu\text{L}$  of 5 wt % Nafion solution. The mixture was ultrasonically dispersed for at least 0.5 h to obtain a homogeneous suspension. Then 20  $\mu\text{L}$  of the suspension was taken by a microsyringe and drop-casted onto a clean RDE with an overall loading of

0.25 mg cm<sup>-2</sup>. The modified RDE was dried naturally in air. Prior to the tests, the electrochemical cell was saturated by purging N<sub>2</sub> or O<sub>2</sub> for at least 30 min. The linear sweep voltammetry (LSV) scan potential was set from 1.2 to 0 V, the scan rate was 10 mV s<sup>-1</sup>, and the rotational speeds were 400–1600 rpm. In the SCN<sup>-</sup> poisoning experiment, the working electrode with CoP/CNT was immersed in 0.01 M KSCN solution for 2 h. The immersed electrode was then immediately tested by LSV in O<sub>2</sub>-saturated 0.1 M KOH to avoid the slow reaction between SCN<sup>-</sup> and KOH.

The rotating ring-disk electrode (RRDE) measurements were conducted in O<sub>2</sub>-saturated 0.1 M KOH at 1600 rpm and a scan rate of 10 mV s<sup>-1</sup>. The ring potential was set as 1.3 V. The *n* value and peroxide yield (HO<sub>2</sub><sup>-</sup>) were calculated by the following equations:

$$\text{HO}_2^-(\%) = 200 \times \frac{I_r/N}{I_d + I_r/N} \quad (1)$$

$$n = 4 \times \frac{I_d}{I_d + I_r/N} \quad (2)$$

where *I<sub>r</sub>* and *I<sub>d</sub>* are the ring and disk currents, respectively, and *N* is the current collection efficiency of RRDE (0.37).

## 5. Theoretical Calculation Details

All the density functional theory (DFT) calculations were conducted with the projector-augmented wave method implemented in the Vienna *ab initio* Simulation Package (VASP).<sup>[S1,2]</sup> The implicit solvent model was included by VASPsol.<sup>[S3]</sup> Atomic models, including C<sub>60</sub> on the same side and opposite sides of a CoP molecule that is pre-stabilized on intact graphene were built for corresponding investigations. A 8×4×1 sized supercell consisting of 128 carbon atoms was used as the graphene-based matrix. Periodic boundary conditions and a supercell with a separation of about 14 Å were used to ensure that the interactions between adjacent supercells were negligible. Meanwhile, a vacuum of 15 Å was imposed in the Z direction. The Perdew-Burke-Ernzerhof (PBE) within the generalized gradient approximation (GGA) was employed as an exchange-correlation functional.<sup>[S4]</sup> A plane-wave cutoff energy of 450 eV was chosen for all the computations to describe all atoms' valence electrons. The convergence criterion of energy and force was set to 10<sup>-4</sup> eV and 0.02 eV Å<sup>-1</sup>, respectively. The van der Waals (vdW) interactions were described by the Grimme's scheme (DFT-D3) correction method.<sup>[S5]</sup>

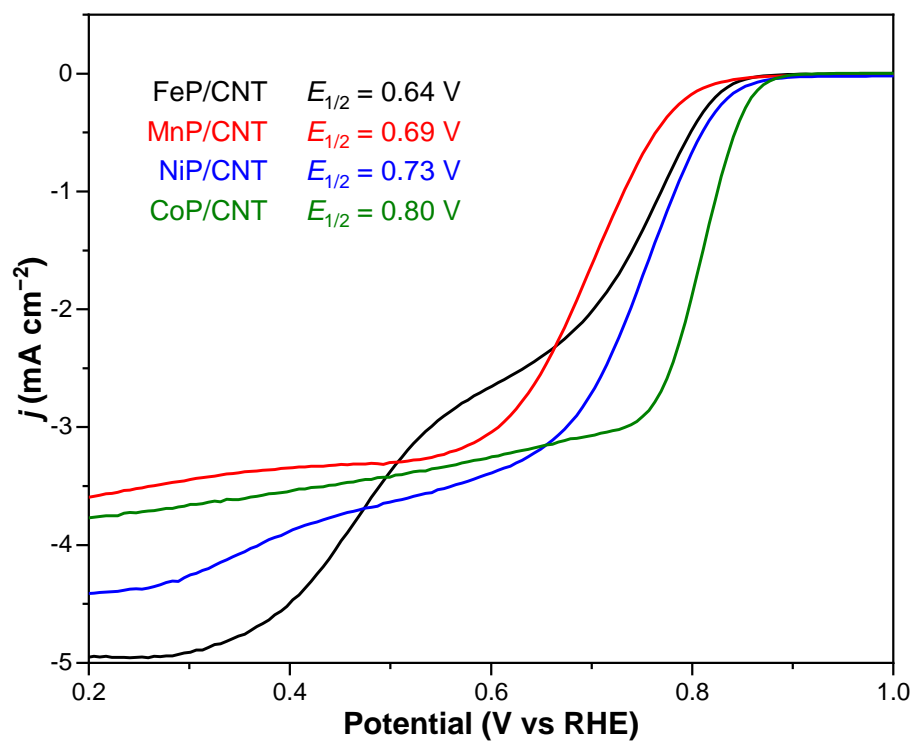

**Figure S1.** Polarization plots of ORR on various MP/CNT (M = Fe, Mn, Ni, Co) with a MP loading of 50 wt.% and their corresponding  $E_{1/2}$  values in 0.1 M KOH at 1600 rpm.

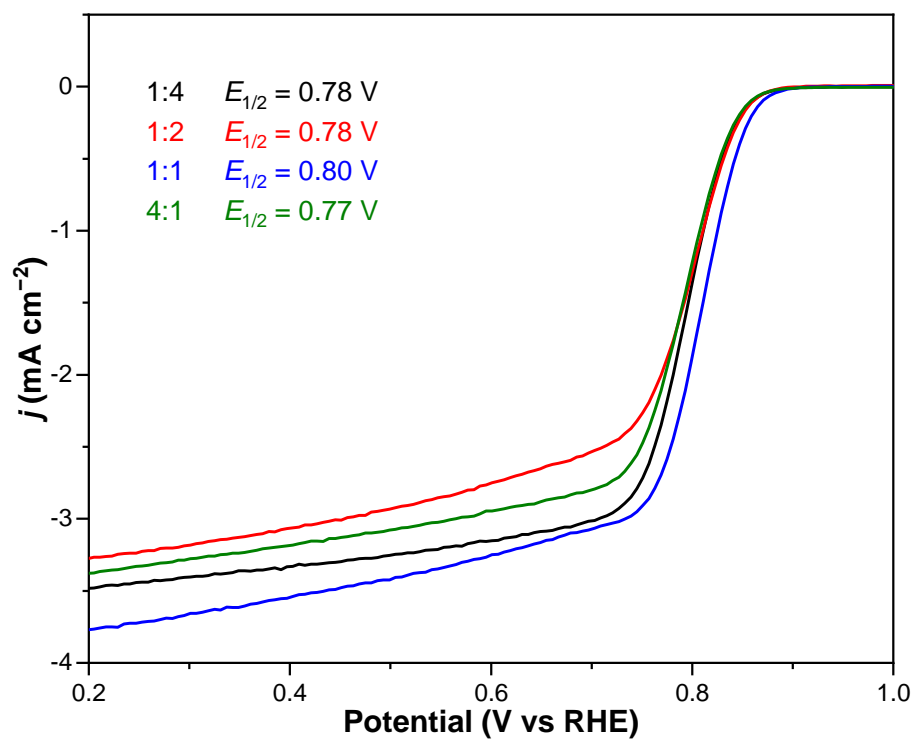

**Figure S2.** Polarization plots of ORR on various CoP/CNT with CoP:CNT mass ratios of 1:4, 1:2, 1:1, 4:1 and their corresponding  $E_{1/2}$  values in 0.1 M KOH at 1600 rpm.

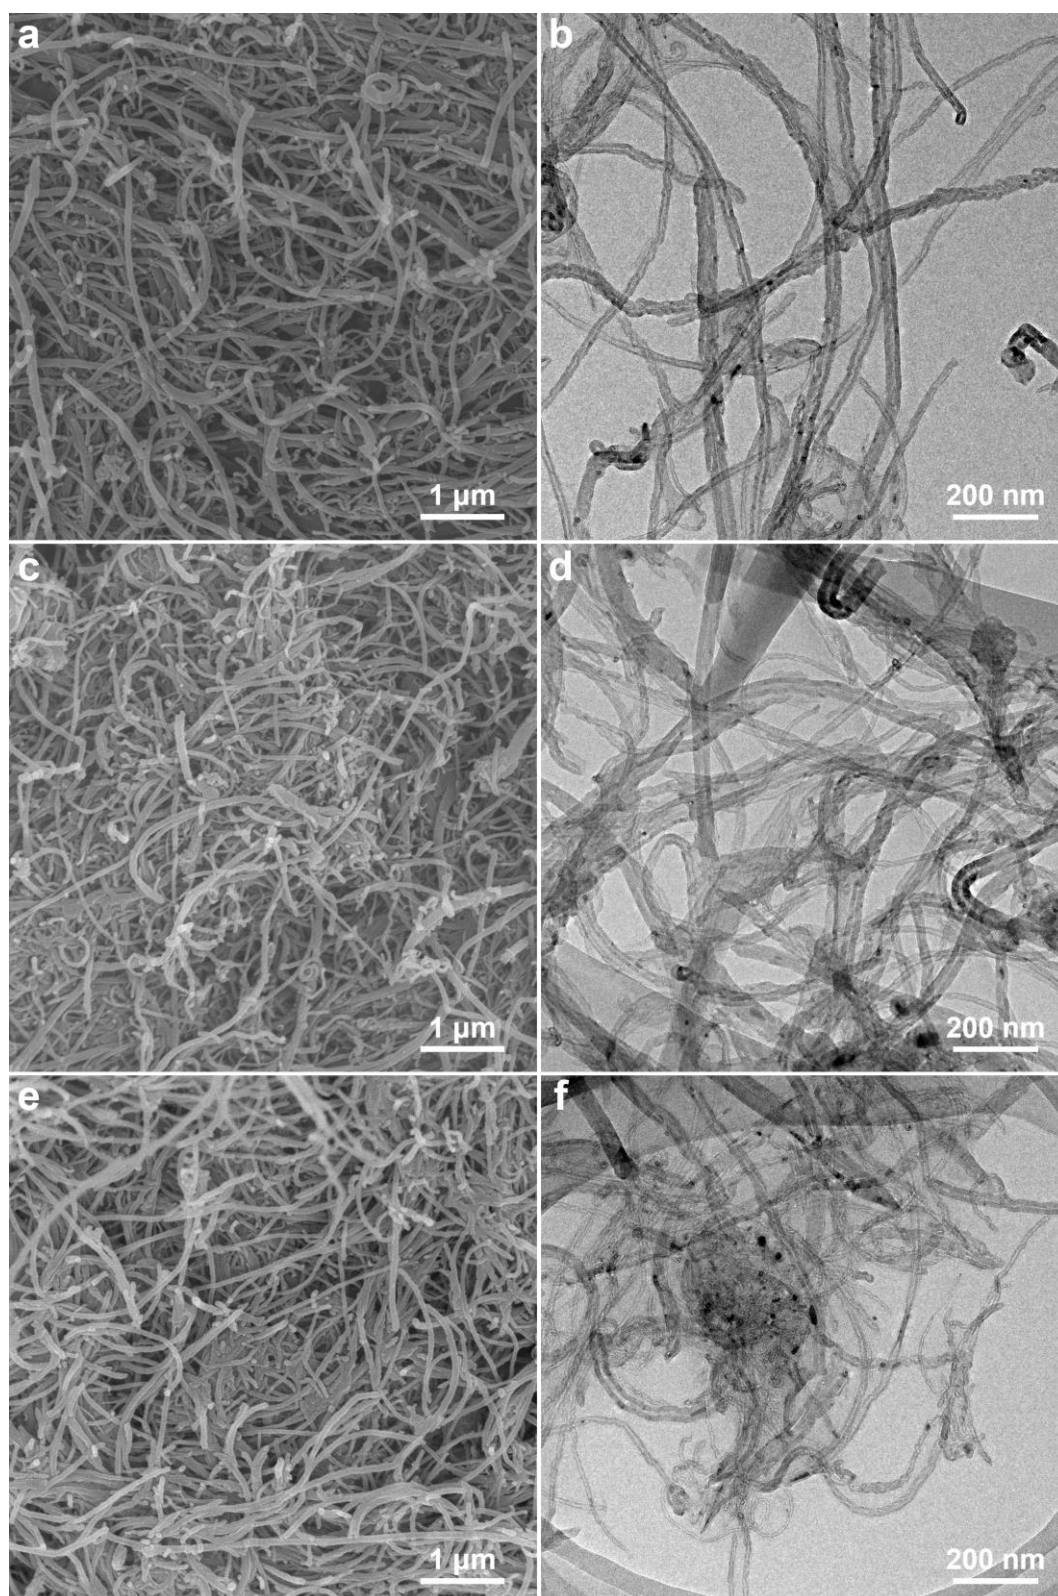

**Figure S3.** SEM and TEM images of CNT (a,b), CoP/CNT (c,d), and C<sub>60</sub>-CoP/CNT (e,f).



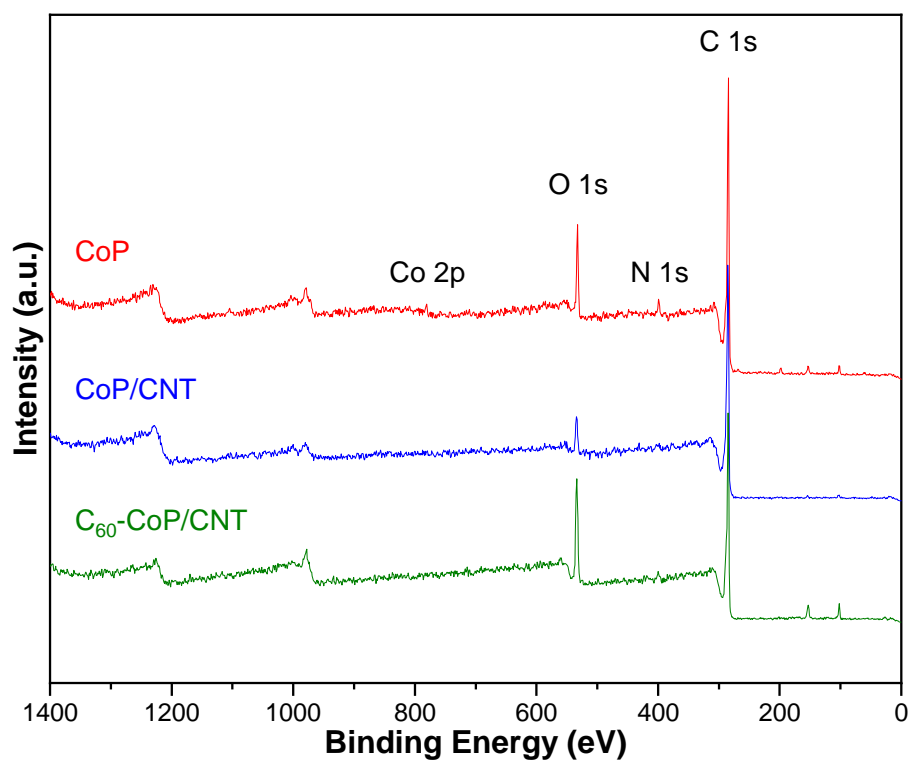

**Figure S4.** Full-survey XPS spectra of CoP, CoP/CNT, and C<sub>60</sub>-CoP/CNT.

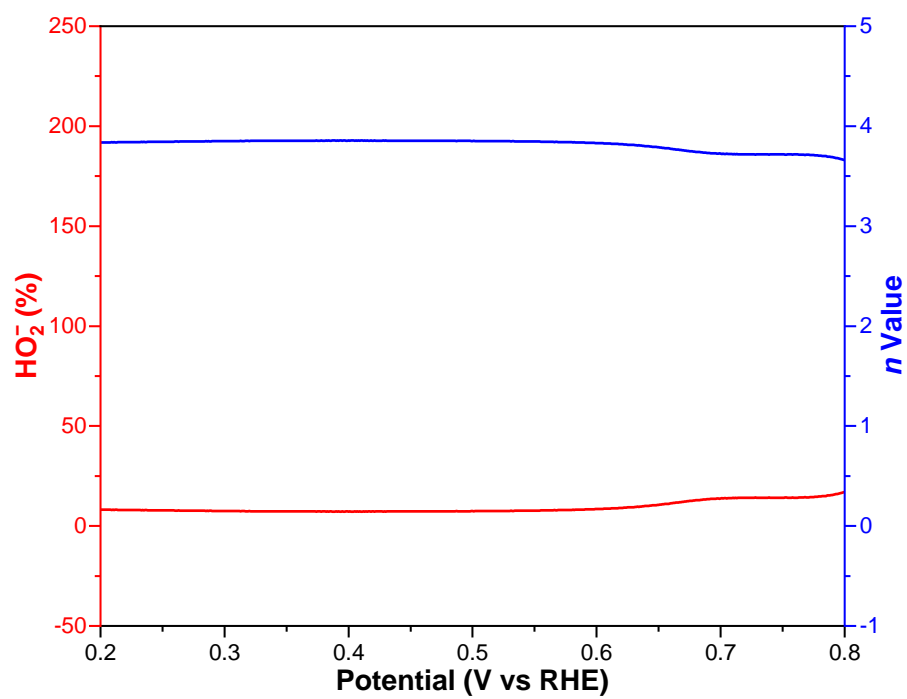

**Figure S5.**  $\text{HO}_2^-$  yield and electron transfer number ( $n$ ) value derived from the rotating ring-disk electrode test of CoP/CNT.

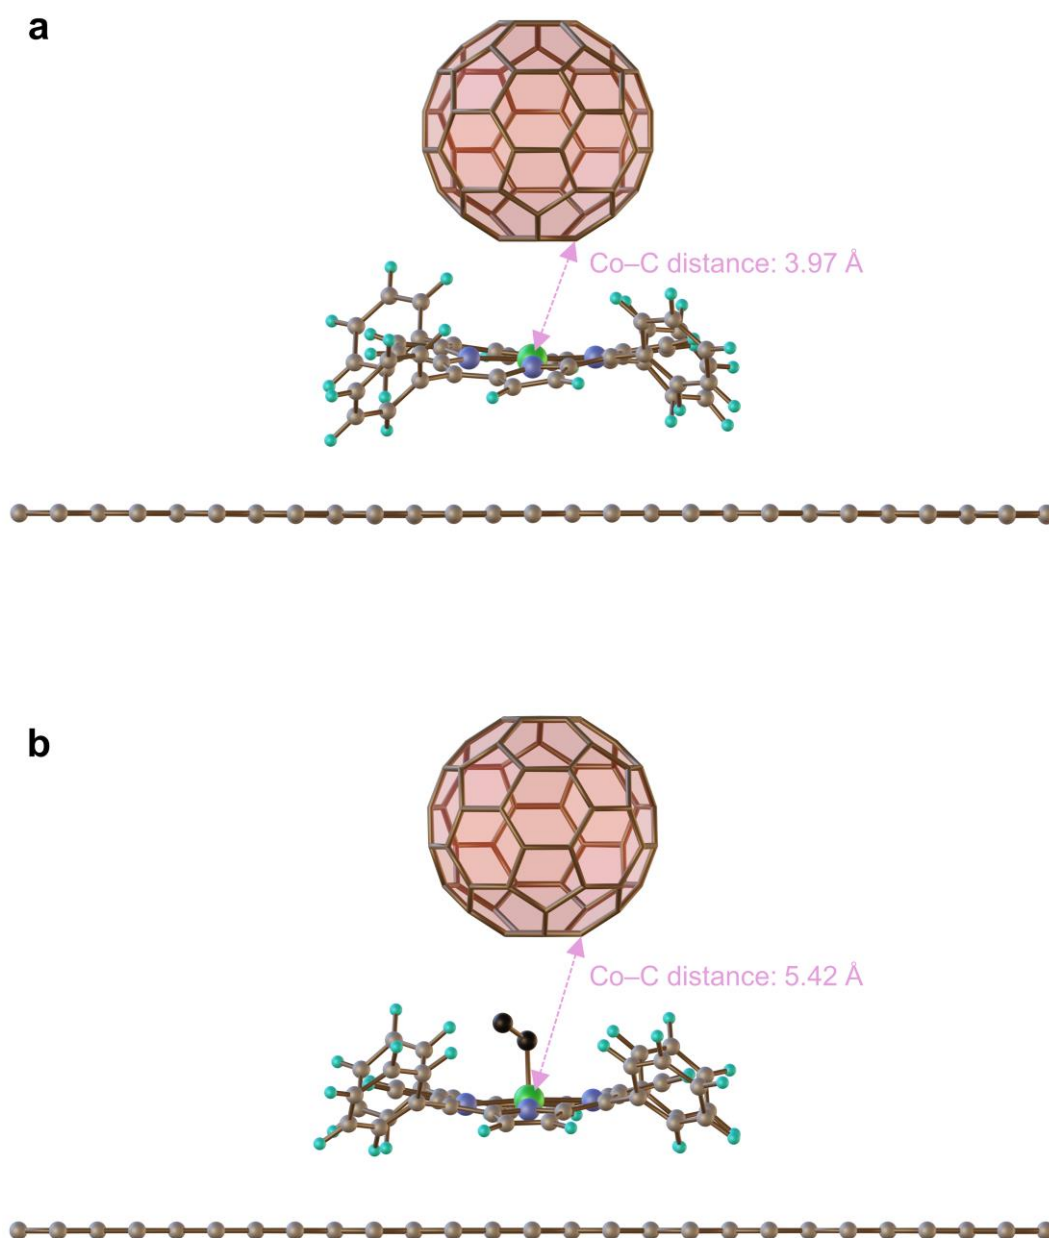

**Figure S6.** Geometric configurations of  $C_{60}$  adsorbed to carbon-supported CoP without (a) and with (b) an  $O_2$  molecule bound to the Co site. The spatial distances between Co atom and a C atom in the bottom pentagon of  $C_{60}$  are indicated. Color code: C, cyan; N, blue; H, white; Co, green; O, black.

The extended spatial distance between Co atom and  $C_{60}$  molecule after  $O_2$  adsorption indicates that steric hindrance is created after  $C_{60}$  adsorption such that  $O_2$  molecules will have to overcome the considerable interactions between  $C_{60}$  and CoP to be able to approach the central Co atom.

## References

- [S1] G. Kresse, J. Furthmuller, *Phys. Rev. B* **1996**, *54*, 11169.
- [S2] G. Kresse, D. Joubert, *Phys. Rev. B* **1999**, *59*, 1758.
- [S3] K. Mathew, R. Sundararaman, K. Letchworth-Weaver, T.A. Arias, R.G. Hennig, *J. Chem. Phys.* **2014**, *140*, 084106.
- [S4] J.P. Perdew, K. Burke, M. Ernzerhof, *Phys. Rev. Lett.* **1996**, *77*, 3865.
- [S5] S. Grimme, J. Antony, S. Ehrlich, H. Krieg, *J. Chem. Phys.* **2010**, *132*, 154104.
